# Supplementary material for: USP42 enhances homologous recombination repair by promoting R-loop resolution with a DNA–RNA helicase DHX9
Source: PubMed Central journal article supplement (PMC7296013; doi:10.1038/s41389-020-00244-4), 2020-06-15
Supplement: 41389_2020_244_MOESM1_ESM.pdf [file 41389_2020_244_MOESM1_ESM.pdf]

## Supplementary Information for

### **USP42 enhances homologous recombination repair by promoting R-loop resolution with a DNA-RNA helicase DHX9**

Misaki Matsui<sup>1</sup>, Ryo Sakasai<sup>2</sup>, Masako Abe<sup>3</sup>, Yusuke Kimura<sup>1</sup>, Shoki Kajita<sup>1</sup>, Wakana Torii<sup>1</sup>, Yoko Katsuki<sup>3</sup>, Masamichi Ishiai<sup>4</sup>, Kuniyoshi Iwabuchi<sup>2</sup>, Minoru Takata<sup>3</sup> and Ryotaro Nishi<sup>\*,1,5</sup>

<sup>1</sup>Department of Biomedical Sciences, Ritsumeikan University, Kusatsu, Shiga, 525-8577, Japan

<sup>2</sup>Department of Biochemistry I, Kanazawa Medical University, Kahoku, Ishikawa, 920-0293, Japan

<sup>3</sup>Department of Late Effects Studies, Radiation Biology Centre, Graduate School of Biostudies, Kyoto University, Kyoto, Kyoto, 606-8501, Japan

<sup>4</sup>Central Radioisotope Division, National Cancer Centre Research Institute, Chuoku, Tokyo, 104-0045, Japan

<sup>5</sup>School of Bioscience and Biotechnology, Tokyo University of Technology, Hachioji, Tokyo, 192-0982, Japan

\*Correspondence to Ryotaro Nishi: [nishirtr@stf.teu.ac.jp](mailto:nishirtr@stf.teu.ac.jp)

This PDF file includes:           Supplementary Figures S1-S5

                                          Supplementary Table S1-S3

Figure S1

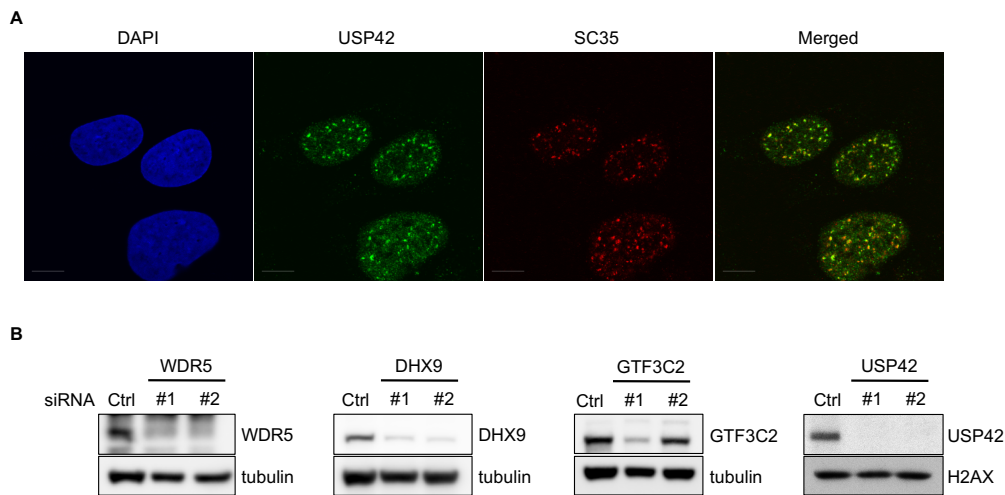

**Supplementary Figure S1 A focused screen identified transcription-related nuclear speckle factors as HR regulators**

(A) U2OS cells were subjected to immunofluorescence staining with anti-USP42 and anti-SC35 antibodies. Nuclei were stained with DAPI. Scale bar: 10  $\mu$ m. (B) U2OS cells transfected with the indicated siRNAs were subjected to immunoblotting analysis with the indicated antibodies.

Figure S2

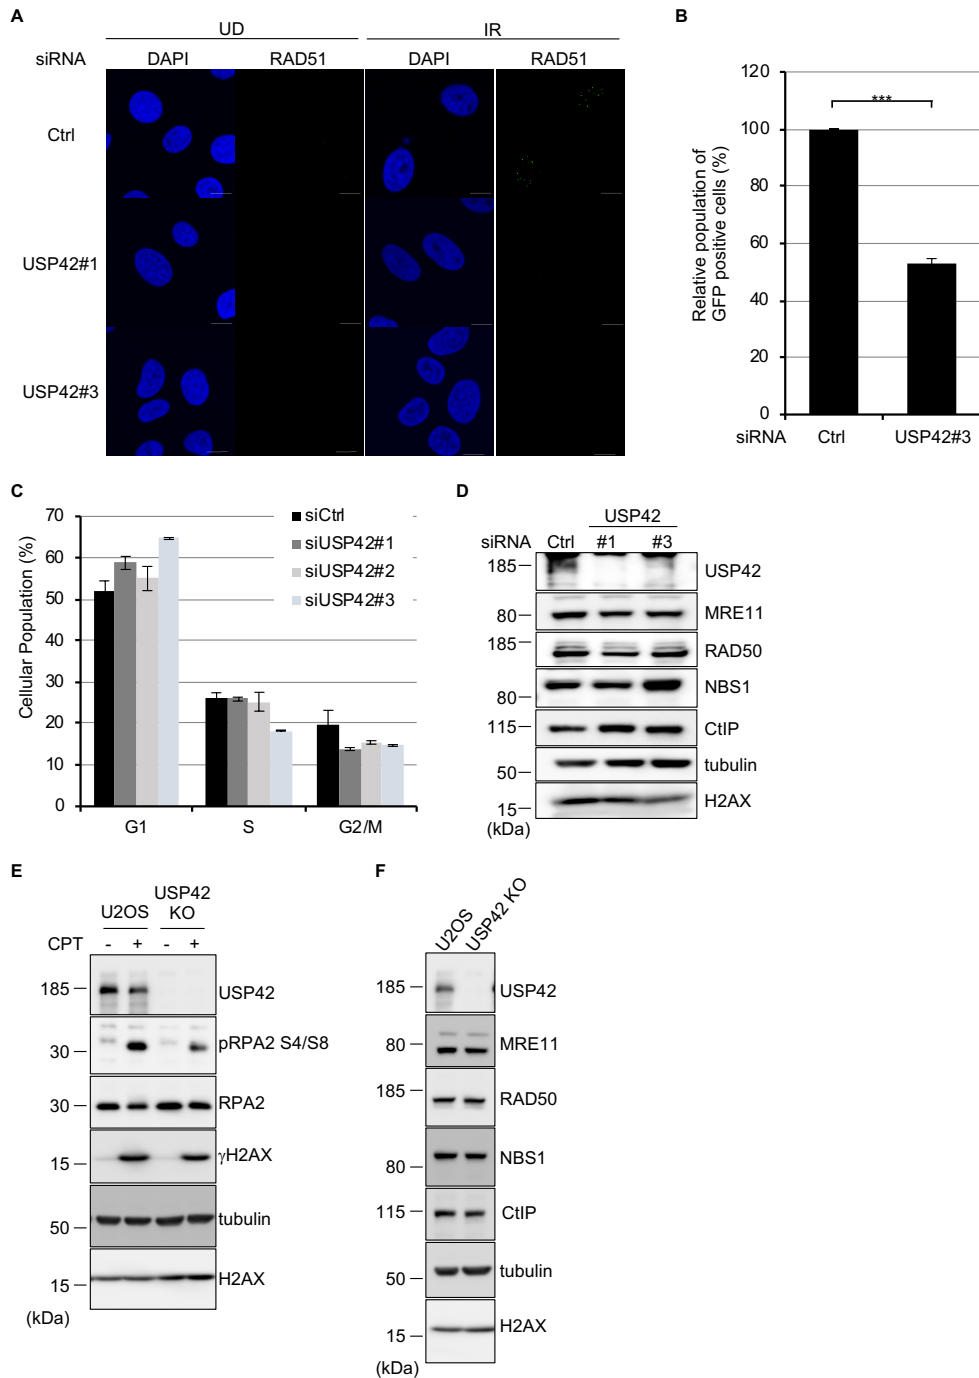

### Supplementary Figure S2 USP42 promotes HR by facilitating DNA-end resection

(A) RAD51 foci formation efficiency was examined with the cells transfected with the indicated siRNAs. The Representative images are shown. Scale bar: 10  $\mu$ m. (B) A DR-GFP assay was performed with the indicated siRNAs (mean  $\pm$  SEM, n=3). (C) U2OS cells were transfected with the indicated siRNAs and then cell cycle profiles were analysed (mean  $\pm$  SEM,

n=3). (D) U2OS cells transfected with the indicated siRNAs were subjected to immunoblotting analysis with the indicated antibodies. (E) U2OS and USP42 KO cells were treated with CPT and analysed by immunoblotting with the indicated antibodies. (F) U2OS and USP42 KO cells were investigated for the expression of HR factors by immunoblotting with the indicated antibodies. \*\*\*:  $p < 0.005$ .

**Figure S3**

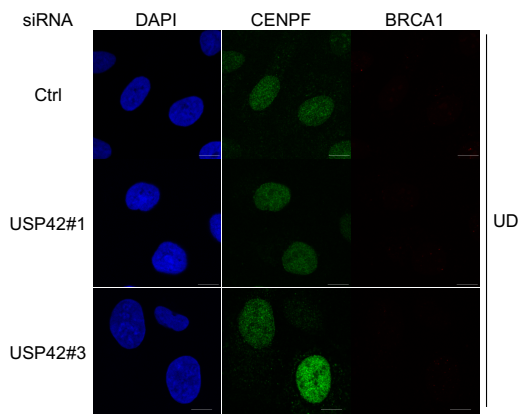

**Supplementary Figure S3 USP42 is required for efficient recruitment of BRCA1 to DSB sites**

BRCA1 foci formation efficiency was examined with the cells transfected with the indicated siRNAs. Representative images for undamaged cells (UD) are shown. Scale bar: 10  $\mu$ m.

Figure S4

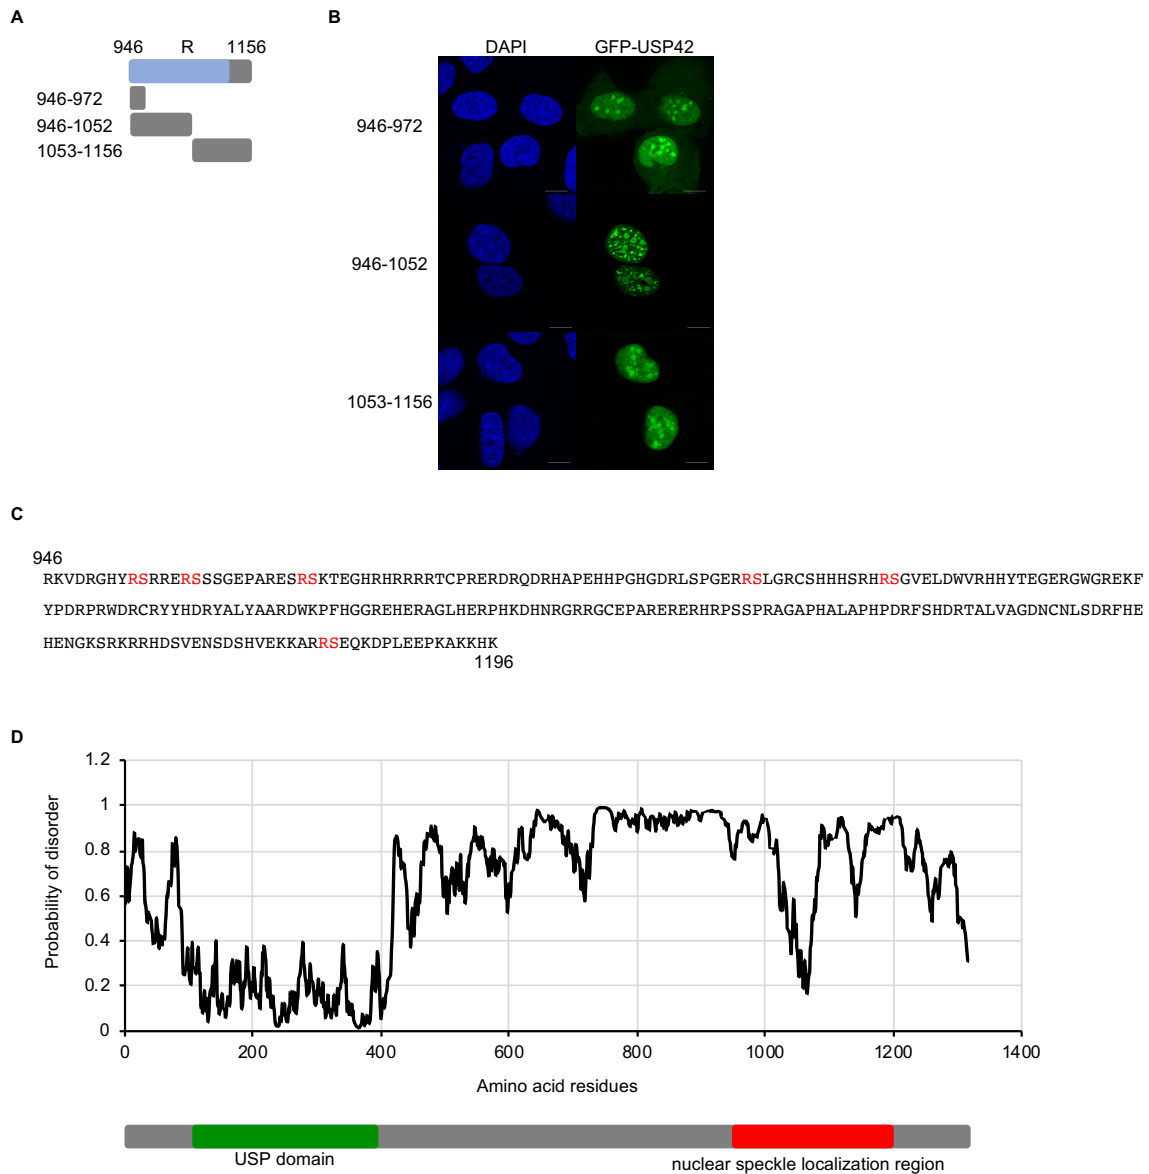

### Supplementary Figure S4 Nuclear speckle localization of USP42 is required for efficient homologous recombination

(A) Schematic representation of truncated USP42 proteins. The numbers represent amino acid residues. R: arginine-rich region. (B) Subcellular localization of GFP-fused truncated USP42 proteins. Cells transfected with the plasmids coding the indicated GFP-USP42 were subjected to fluorescence microscopy analysis. Scale bar: 10  $\mu$ m. (C) Amino acid sequence of USP42 (946-1196 a. a.) in which RS repeats are indicated with red characters. The numbers represent amino acid residues. (D) The probability of disorder of USP42 protein predicted by IUPred2A

was plotted against amino acid residues. A schematic representation of USP42 is also shown underneath the graph. The USP domain (green) and nuclear speckle localization region (red) are indicated.

**Figure S5**

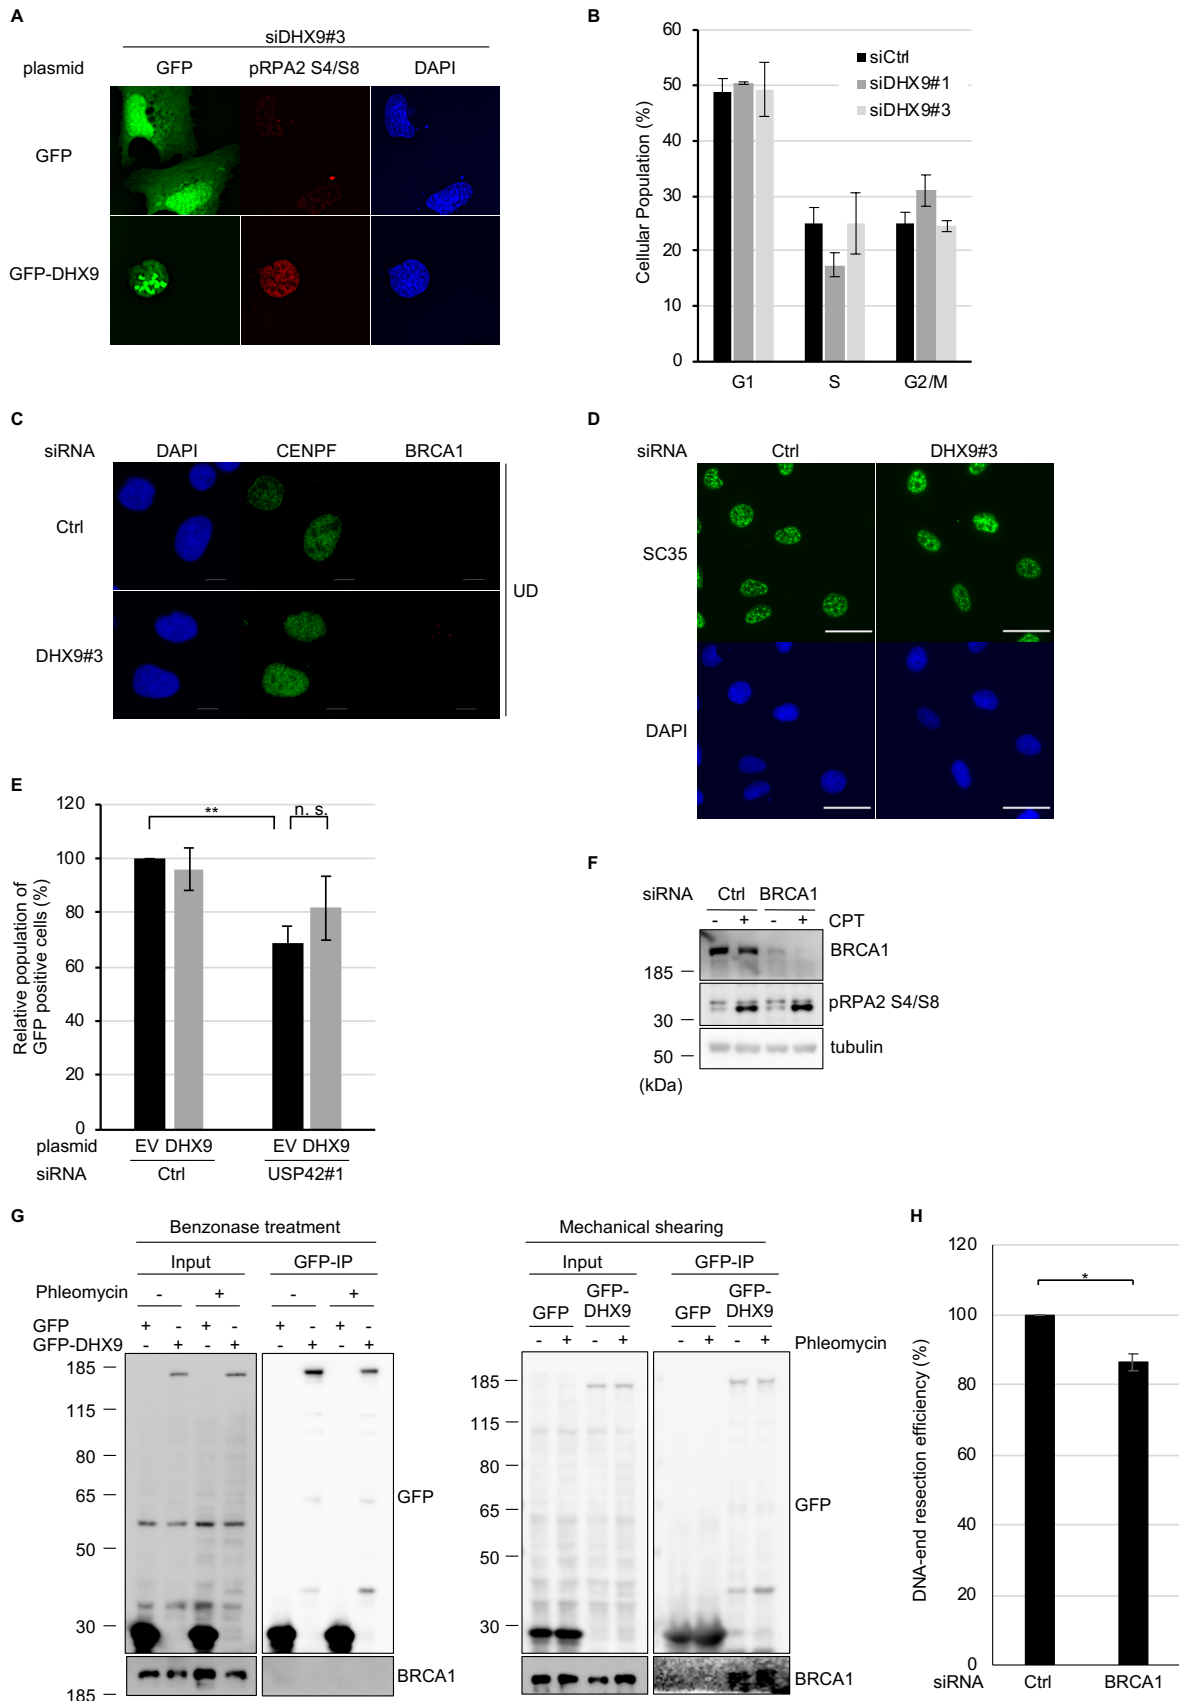



**Supplementary Figure S5 USP42 is epistatic with DHX9 in the cellular survival after DSB induction and promotes resolution of DSB-induced R-loop.**

(A) U2OS cells that were transfected with the siRNA (siDHX9#3) and plasmid coding either GFP or siRNA-resistant GFP-DHX9 were treated with 1  $\mu$ M CPT and then analysed by immunofluorescent staining with an anti-pRPA2 S4/S8 antibody. Cells transfected with plasmids were detected by GFP signal. (B) U2OS cells were transfected with the indicated siRNAs, and then cell cycle profiles were analysed (mean  $\pm$  SEM, n=3). (C) BRCA1 foci formation efficiency was examined with the cells transfected with the indicated siRNAs. Representative images for undamaged cells (UD) are shown. Scale bar: 10  $\mu$ m. (D) U2OS cells transfected with the indicated siRNA were subjected to immunofluorescent staining with an anti-SC35 antibody. Scale bar: 40  $\mu$ m. (E) A DR-GFP assay was performed with the cells transfected with the indicated siRNA and plasmid (mean  $\pm$  SEM, n=4). EV: empty vector, DHX9: mCherry-DHX9. (F) U2OS cells transfected with the indicated siRNAs were treated with CPT and analysed by immunoblotting with the indicated antibodies. (G) U2OS cells transfected either with GFP or GFP-DHX9 coding plasmid were treated with phleomycin. Cells were lysed either with the IP lysis buffer containing 150 mM NaCl (left) or by mechanical shearing (right). The interaction between DHX9 and BRCA1 was analysed by immunoprecipitation with an anti-GFP antibody followed by immunoblotting with the indicated antibodies. (H) A DNA-end resection assay was carried out with the cells transfected with the indicated siRNAs (mean  $\pm$  SEM, n=3). \*: p<0.05, \*\*: p<0.01, n. s.: not significant.

**Supplementary Table S1 The siRNAs used in this research**

| Target   | siRNA# | Sequence                    |
|----------|--------|-----------------------------|
| AAAS     | 1      | GAGCAAGUGUGGAAGAGAU (dTdT)  |
|          | 2      | CCACCCAACAAGUUUGCA (dTdT)   |
| ACF      | 1      | GCACCCUAAUUAAACCUGA (dTdT)  |
|          | 2      | CAAGACUUAGCAGCAUUA (dTdT)   |
| ACIN1    | 1      | CAGAAGAAACCUUCCAUCA (dTdT)  |
|          | 2      | CACAUCACCUAUCCUACA (dTdT)   |
| ACTL6A   | 1      | GUAUACUCAGGAAAAGAAU (dTdT)  |
|          | 2      | GAGGAAACACACUAUAUCA (dTdT)  |
| AKAP8    | 1      | GACAGUAGUCACUUGGAA (dTdT)   |
|          | 2      | GUUCAAGCUUCAGCCUUU (dTdT)   |
| AQR      | 1      | CAGUCAAAAAGUCUGAGUA (dTdT)  |
|          | 2      | AGUUCACUCAUACACAGAU (dTdT)  |
| ARNTL    | 1      | GAGAACCAGGUUAUCCAU (dTdT)   |
|          | 2      | GAUCAAGUAGUCCAGUAA (dTdT)   |
| ASH2L    | 1      | GUAUGAACGGUUUUUUUA (dTdT)   |
|          | 2      | CUGAGAACACCCGAAAUCA (dTdT)  |
| ATXN1    | 1      | CUGAGAAUGGCAGAACUGAA (dTdT) |
|          | 2      | GAGACUGGUCUAUUGCUU (dTdT)   |
| BCAS2    | 1      | CCAGUAGAGCAUCAAGCA (dTdT)   |
|          | 2      | CAGAAGCAACUUCAGAAU (dTdT)   |
| BCLAF1   | 1      | CGAAGGUAGCUCUAUGGUU (dTdT)  |
|          | 2      | ACAUCGUAGGGUGACUGAU (dTdT)  |
| BRCA1    | -      | GGAACCGUCUCCACAAAG (dTdT)   |
| BUD31    | 1      | GAGAUCUUUCUGCUGUCUA (dTdT)  |
|          | 2      | CGAGAUUCUUUCUGCUGU (dTdT)   |
| C12orf11 | 1      | GAGGAAGAGUUACAGACUA (dTdT)  |
|          | 2      | CAGUGAAGUUAUAGUGUU (dTdT)   |
| C14orf92 | 1      | AGUGCUUUUGGUCCUAGA (dTdT)   |
|          | 2      | CACUCUAUAGGAACUCAGU (dTdT)  |
| C21orf66 | 1      | GUAUAGAGUAGACUCCCGU (dTdT)  |
|          | 2      | GUAAGGGCCCGUUUUUAG (dTdT)   |
| CCAR1    | 1      | GAGAAGUAGAGUCCUUAAGA (dTdT) |
|          | 2      | CUCAGAUCAUGCUUAUAGA (dTdT)  |
| CEBPA    | 1      | CUCCAUGCCUACUGAGUA (dTdT)   |
|          | 2      | CGAAGCAGAUACAGUCCAU (dTdT)  |
| CEBPB    | 1      | CUGAGUAAUCGUUAAAGA (dTdT)   |
|          | 2      | CGUCUGUAUUAUUUGGAA (dTdT)   |
| CHERP    | 1      | CCAAUGGCCUACUUCGA (dTdT)    |
|          | 2      | GAUAAGUGGGACCAUAUA (dTdT)   |
| CLSTN1   | 1      | GGAUCCCUAACUGGACCA (dTdT)   |
|          | 2      | GAGUUGAGGCUCUCCAUCU (dTdT)  |
| CRSP6    | 1      | AGUUGAGACACCUAGUGUA (dTdT)  |
|          | 2      | UGAUGUCCAAAUUCCUAGU (dTdT)  |
| CHIP     | -      | GCUAAAACAGGAACGAUC (dTdT)   |
|          | 1      | CUCUAGCCAGCAUUUAGU (dTdT)   |
| DDX17    | 1      | GUGGUUAUUUGGAUUGCUU (dTdT)  |
|          | 2      | GUGUCAUUUCUGUCUACA (dTdT)   |
| DDX3X    | 1      | CUCAGAUUCGUAUAUAGU (dTdT)   |
|          | 2      | CUCAGAUUCGUAUAUAGU (dTdT)   |
| DDX46    | 1      | CAGAGAUCAGUGAAUACU (dTdT)   |
|          | 2      | CUCUGAGCCGAAUUAUCA (dTdT)   |
| DDX48    | 1      | GAGCAAUCAAGCAGAUCAU (dTdT)  |
|          | 2      | GACUACAUGAAUGUCCAGU (dTdT)  |
| DDX5     | 1      | UGAAGCAGUAAGAAUGCUU (dTdT)  |
|          | 2      | CGACCUUAUCUCUGUGCUU (dTdT)  |
| DHX9     | 1      | CUGCUAUCUACAGCCAGUU (dTdT)  |
|          | 2      | CAGGAUUAUGCAGGUGUU (dTdT)   |
|          | 3      | GUAAUAGAACGUUAGCUGA (dTdT)  |
| DNAJA1   | 1      | GAAAGAUGCCAGAAUAUA (dTdT)   |
|          | 2      | GAGUGAAGGACUGAAUCA (dTdT)   |
| EIF4A1   | 1      | CAGGUUCUUUAGUCAUCA (dTdT)   |
|          | 2      | GACGUAUUUAUGAGGGAGU (dTdT)  |
| ELAVL1   | 1      | CUGAUGAAUUCUCCUUGU (dTdT)   |
|          | 2      | GUGAUCAAAGACGCCAACU (dTdT)  |
| EWSR1    | 1      | GACUCUGACAACAGUGCAA (dTdT)  |
|          | 2      | CCAUGAUCCAUUACCU (dTdT)     |
| EXOSC9   | 1      | GAAAGAUGCCGGUCCGUUU (dTdT)  |
|          | 2      | GAGCUAAUUAUGAAAGCUU (dTdT)  |
| FAM3C    | 1      | GUGCAUGAGUUAUUGUCUCU (dTdT) |
|          | 2      | GCACUAAAUUUCGAACCU (dTdT)   |
| FUS      | 1      | GAGUCUGGGCUGAAUACU (dTdT)   |
|          | 2      | GAGGUAACUAUGGCCAAGA (dTdT)  |

## Supplementary Table S2 The antibodies used in this research

| Antibodies                                                      | SOURCE                    | IDENTIFIER      |
|-----------------------------------------------------------------|---------------------------|-----------------|
| Anti-WDR5 antibody                                              | Abcam                     | Cat#ab56919     |
| Anti-RNA Helicase A antibody                                    | Abcam                     | Cat#ab54593     |
| GTF3C2 Antibody                                                 | Proteintech               | Cat#27494-1-AP  |
| Anti-USP42 antibody produced in rabbit                          | ATLAS                     | Cat#HPA006752   |
| Anti-USP42 antibody                                             | Abcam                     | Cat#ab121254    |
| Monoclonal Anti-splicing Factor SC35 antibody produced in mouse | Sigma-Aldrich             | Cat#S4045       |
| Anti-SC35 antibody-Nuclear Speckle Marker                       | Abcam                     | Cat#ab11826     |
| Anti-RPA32/RPA2 (phosphor S4+S8) antibody                       | Abcam                     | Cat#ab87277     |
| Anti-phospho-Histone H2A.X (Ser139) antibody, clone JBW301      | Merck Millipore           | Cat#05-636      |
| Monoclonal Anti- $\alpha$ -Tubulin antibody produced in mouse   | Sigma-Aldrich             | Cat#T9026       |
| Anti-BrdU Antibody                                              | GE Healthcare             | Cat#RPN202      |
| Anti-RAD51 Antibody                                             | Bio Academica             | Cat#70-001      |
| BRCA1 antibody (D-9)                                            | Santa Cruz Biotechnology  | Cat#sc-6954     |
| Anti-53BP1 Antibody, clone BP13                                 | Merck Millipore           | Cat#MAB3802     |
| Anti-RPA32/RPA2 antibody [9H8]                                  | Abcam                     | Cat#ab2175      |
| Anti-Histone H2A.X antibody-ChIP Grade                          | Abcam                     | Cat#ab11175     |
| Cyclin A (H-432) Antibody                                       | Santa Cruz Biotechnology  | Cat#sc-751      |
| Mre11 antibody [12D7]                                           | Gene Tex                  | Cat#GTX70212    |
| Rad50 antibody [13B3]                                           | Gene Tex                  | Cat#GTX70228    |
| Anti-p95/NBS1 antibody                                          | Abcam                     | Cat#ab23996     |
| ChIP antibody (mAb)                                             | Active Motif              | Cat#61141       |
| Anti-CENPF antibody                                             | Abcam                     | Cat#ab5         |
| Anti-GFP                                                        | Roche                     | Cat#11814460001 |
| Ubiquitin (P4D1) Mouse mAb                                      | Cell Signaling TECHNOLOGY | Cat#3936S       |
| Anti-HA (12CA5)                                                 | Roche                     | Cat#11583816001 |
| Anti-DNA-RNA Hybrid Antibody, clone S9.6                        | Merck Millipore           | Cat#MABE1095    |

**Supplementary Table S3 List of USP42 interactors**

| Gene symbol     | Accession number | Number of matches |
|-----------------|------------------|-------------------|
| <i>DSP</i>      | P15924           | 91                |
| <i>PRPF8</i>    | Q6P2Q9           | 89                |
| <i>USP42</i>    | Q9H9J4           | 87                |
| <i>EFTUD2</i>   | Q15029           | 67                |
| <i>SNRNP200</i> | O75643           | 60                |
| <i>KPRP</i>     | Q5T749           | 58                |
| <i>KRT6B</i>    | P04259           | 40                |
| <i>PRKDC</i>    | P78527           | 39                |
| <i>DHX9</i>     | Q08211           | 38                |
| <i>IGHV3-72</i> | A0A0B4J1Y9       | 33                |
| <i>LRPPRC</i>   | P42704           | 32                |
| <i>PRPF6</i>    | O94906           | 28                |
| <i>VIM</i>      | P08670           | 24                |
| <i>HNRNPM</i>   | P52272           | 24                |
| <i>SRSF6</i>    | Q13247           | 24                |
| <i>RPS3</i>     | P23396           | 23                |
| <i>MYH6</i>     | P13533           | 22                |
| <i>RPS4X</i>    | P62701           | 22                |
| <i>MATR3</i>    | P43243           | 21                |
| <i>EIF4A3</i>   | P38919           | 21                |
| <i>SRSF1</i>    | Q07955           | 20                |
| <i>RPL7</i>     | P18124           | 19                |
| <i>RPS9</i>     | P46781           | 19                |
| <i>RPS18</i>    | P62269           | 18                |
| <i>SAP18</i>    | O00422           | 18                |
| <i>SLC25A6</i>  | P12236           | 18                |
| <i>RPL7A</i>    | P62424           | 17                |
| <i>DDX3X</i>    | O00571           | 16                |
| <i>ARG1</i>     | P05089           | 16                |
| <i>PARP1</i>    | P09874           | 16                |
| <i>SLC25A4</i>  | P12235           | 16                |
| <i>CRNKL1</i>   | Q9BZJ0           | 16                |
| <i>PRPF19</i>   | Q9UMS4           | 16                |
| <i>EIF3CL</i>   | B5ME19           | 15                |
| <i>MYO1C</i>    | O00159           | 15                |
| <i>HNRNPC</i>   | P07910           | 15                |
| <i>PIP</i>      | P12273           | 15                |
| <i>CDC5L</i>    | Q99459           | 15                |
| <i>SF3B1</i>    | O75533           | 14                |
| <i>TUBA4A</i>   | P68366           | 14                |
| <i>TUBA3C</i>   | Q13748           | 14                |
| <i>ACIN1</i>    | Q9UKV3           | 14                |
| <i>ILF3</i>     | Q12906           | 13                |
| <i>TUBB2A</i>   | Q13885           | 13                |
| <i>SF3B3</i>    | Q15393           | 13                |
| <i>SRSF7</i>    | Q16629           | 13                |
